# Supplementary material
Source: publisher figshare collection journal article supplement (https://scielo.figshare.com/articles/dataset/_/7046081)
Supplement: Supplementary file 1 [file Table_1.xls]

## Sheet: Table_1
<b></b>	<b>Conventional</b>	<b>BFT</b>
Inputs
x1 - stocking density (post-larvae m<sup>-2</sup>)	20.5 ± 3.2	113.1 ± 7.2
x2 - feed amount (kg ha<sup>-1</sup> cycle<sup>-1</sup>)	2,185.3 ± 649.6	14,280.2 ± 2,701.2
x3 - labor (man ha<sup>-1</sup>)	0.2 ± 0.0	2.9 ± 0.0
x4 - energy (HP ha<sup>-1</sup>)	0.5 ± 0.0	32.0 ± 0.0
Product
y - Productivity (kg ha<sup>-1</sup> cycle<sup>-1</sup>)	1,529.6 ± 376.0	7,774.9 ± 1,955.7
