# Supplementary material
Source: publisher figshare collection journal article supplement (https://scielo.figshare.com/articles/dataset/_/7046081)
Supplement: Supplementary file 2 [file Table_2.xls]

## Sheet: Table_2
<b>Pond</b>	<b>Mean</b>	<b>Maximum</b>	<b>Minimum</b>
1	0.79 ± 0.14<sup>a</sup>	1.00	0.58
2	0.74 ± 0.12<sup>a</sup>	0.89	0.50
3	0.76 ± 0.13<sup>a</sup>	0.96	0.53
4	0.86 ± 0.11<sup>a</sup>	1.00	0.66
5	0.86 ± 0.10<sup>a</sup>	1.00	0.73
6	0.83 ± 0.13<sup>a</sup>	0.95	0.57
