# Supplementary material
Source: publisher figshare collection journal article supplement (https://scielo.figshare.com/articles/dataset/_/7046081)
Supplement: Supplementary file 3 [file Table_3.xls]

## Sheet: Table_3
<b>Class of Technical Efficiency</b>	<b>DEA (CRS)</b>		<b>DEA (VRS)</b>
	No. of cycles	%	No. of cycles	%
0.50 - 0.60	4	7.0	3	5.3
0.60 - 0.70	6	10.5	5	8.8
0.70 - 0.80	12	21.1	8	14.0
0.80 - 0.90	16	28.1	13	22.8
0.90 - 1.00	19	33.3	28	49.1
Total	57	100.0	57	100.0
Mean	0.82<sup>a</sup>		0.86<sup>a</sup>
Maximum	1.00		1.00
Minimum	0.50		0.53
