# Supplementary material
Source: publisher figshare collection journal article supplement (https://scielo.figshare.com/articles/dataset/_/7046081)
Supplement: Supplementary file 4 [file Table_4.xls]

## Sheet: Table_4
<b></b>	<b>Conventional</b>	<b>BFT</b>
2013
Waste of feed	17.86	n.a.
Waste of post-larvae	19.16	n.a.
Production losses	21.91	n.a.
2014
Waste of feed	21.11	10.87
Waste of post-larvae	21.47	26.37
Production losses	27.09	12.19
