# Supplementary material
Source: publisher figshare collection journal article supplement (https://scielo.figshare.com/articles/dataset/_/7046081)
Supplement: Supplementary file 5 [file Table_5.xls]

## Sheet: Table_5
<b></b>	<b>Conventional</b>	<b>BFT</b>
DEA (CRS)
Efficiency	3	1
Ineffiency	45	8
Average Efficiency	0.79 ± 0.10<sup>a</sup>	0.89 ± 0.11<sup>b</sup>
DEA (VRS)
Efficiency	10	1
Ineffiency	38	8
Average Efficiency	0.85 ± 0.11<sup>a</sup>	0.87 ± 0.11<sup>a</sup>
