# Supplementary material
Source: publisher figshare collection journal article supplement (https://scielo.figshare.com/articles/dataset/_/7046081)
Supplement: Supplementary file 6 [file Table_6.xls]

## Sheet: Table_6
<b>Pond</b>	<b>Mean</b>	<b>Maximum</b>	<b>Minimum</b>
1	0.82 ± 0.13<sup>a</sup>	1.00	0.60
2	0.95 ± 0.07<sup>b</sup>	1.00	0.77
3	0.95 ± 0.05<sup>b</sup>	1.00	0.84
4	0.96 ± 0.04<sup>b</sup>	1.00	0.89
5	0.97 ± 0.02<sup>b</sup>	1.00	0.93
6	0.95 ± 0.02<sup>b</sup>	0.97	0.91
