# Supplementary material
Source: publisher figshare collection journal article supplement (https://scielo.figshare.com/articles/dataset/_/7046081)
Supplement: Supplementary file 7 [file Table_7.xls]

## Sheet: Table_7
<b>Ponds</b>	<b>Mean</b>	<b>Maximum</b>	<b>Minimum</b>
1	0.96 ± 0.05<sup>a</sup>	1.00	0.86
2	0.78 ± 0.08<sup>b</sup>	0.91	0.65
3	0.79 ± 0.12<sup>bc</sup>	1.00	0.63
4	0.89 ± 0.09<sup>ac</sup>	1.00	0.75
5	0.88 ± 0.09<sup>ab</sup>	1.00	0.78
6	0.88 ± 0.14<sup>ab</sup>	1.00	0.61
